# Supplementary material for: iVikodak—A Platform and Standard Workflow for Inferring, Analyzing, Comparing, and Visualizing the Functional Potential of Microbial Communities
Source: PubMed Central journal article supplement (PMC6339920; doi:10.3389/fmicb.2018.03336), 2019-01-14

**Supplementary file 1:** Summary of results generated by Burrito web platform for temporal observation of differences in inferred function profile of gut microbiota of antibiotic treated mice.

**A**

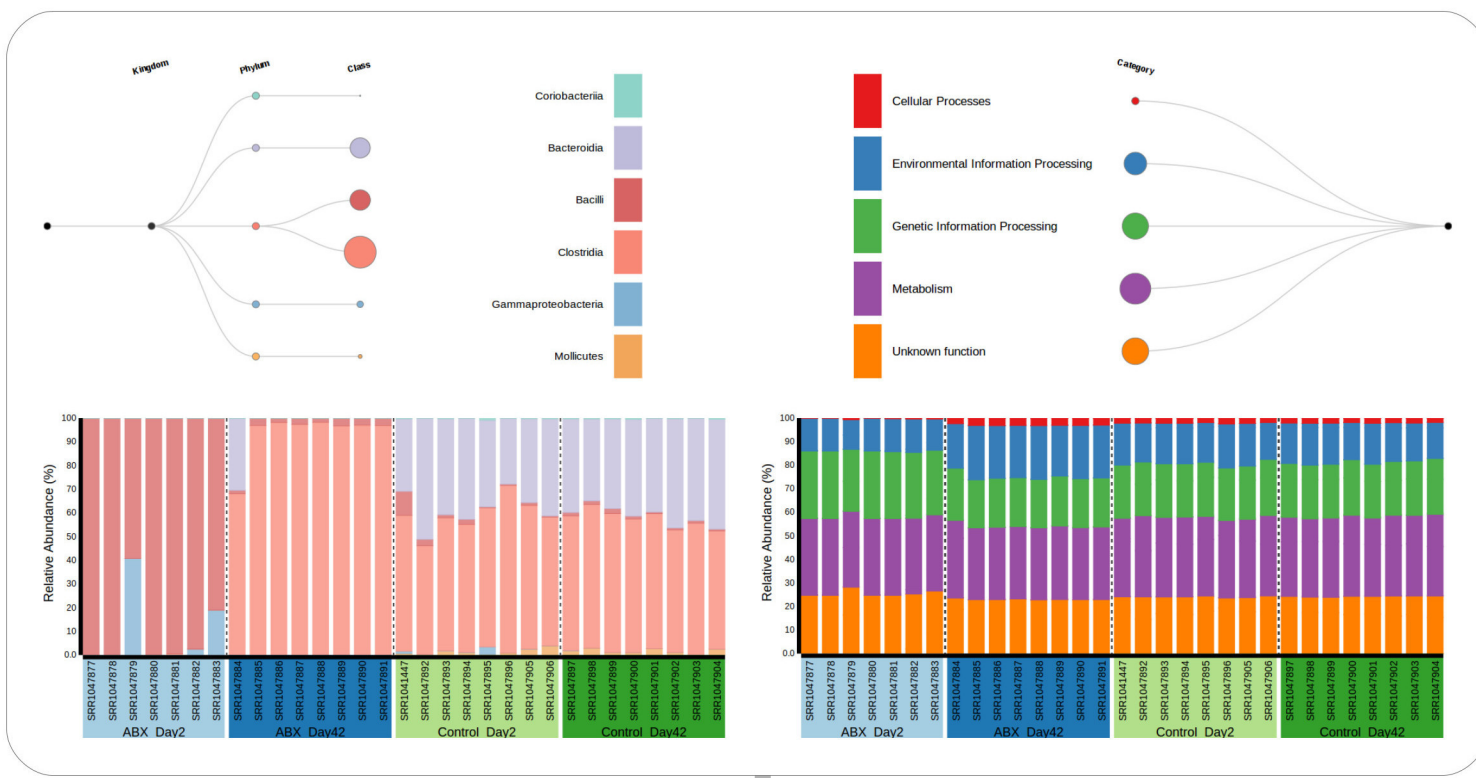

Select Bacteroidia

**B**

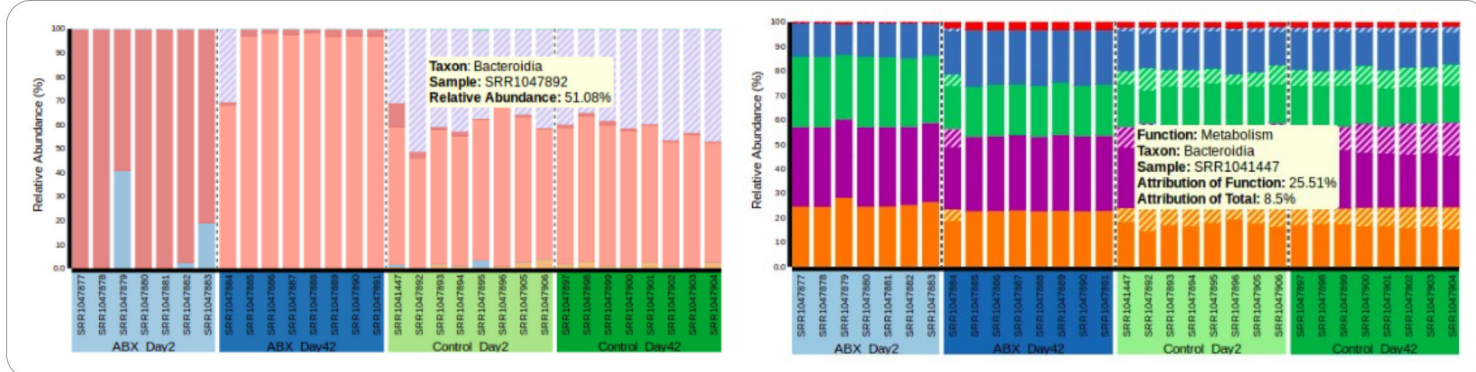

Expand Metabolism; Select Amino Acid Metabolism

**C**

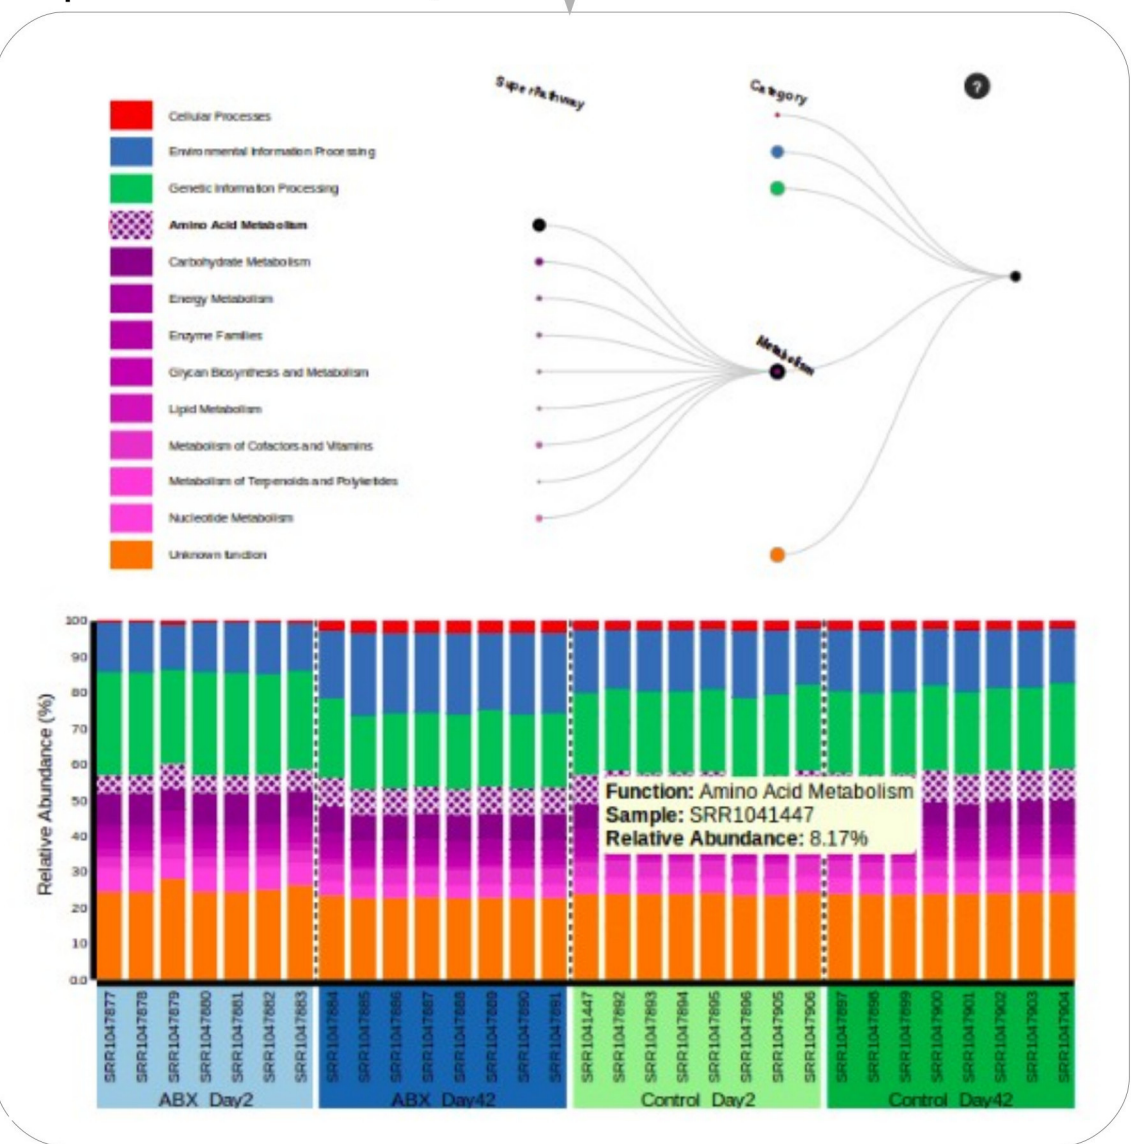

Select Taxon-Function Edge

**D**

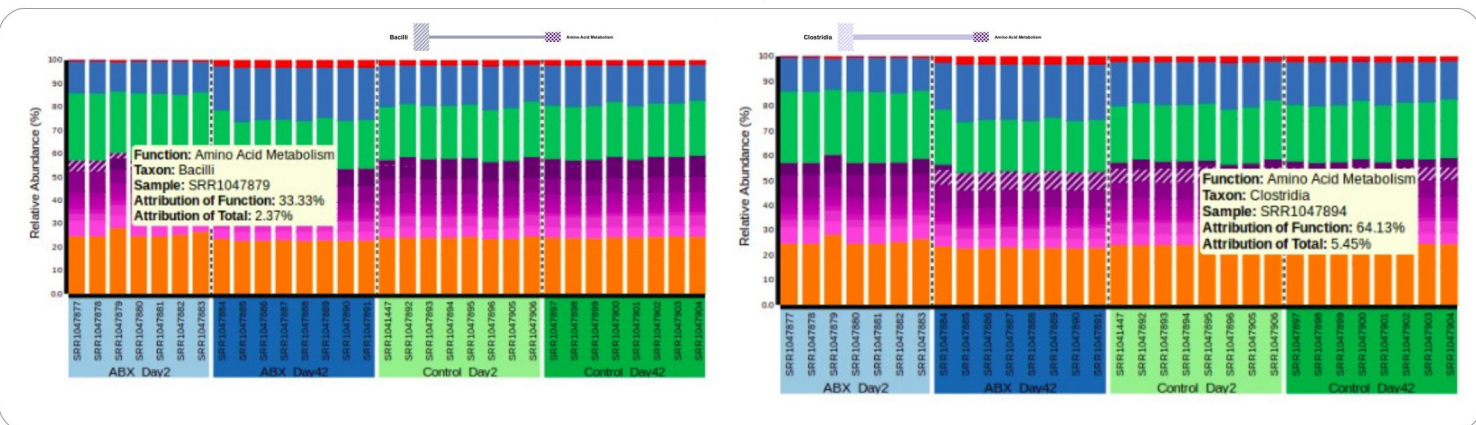

Expand Categories; Select Bacilli

**E**

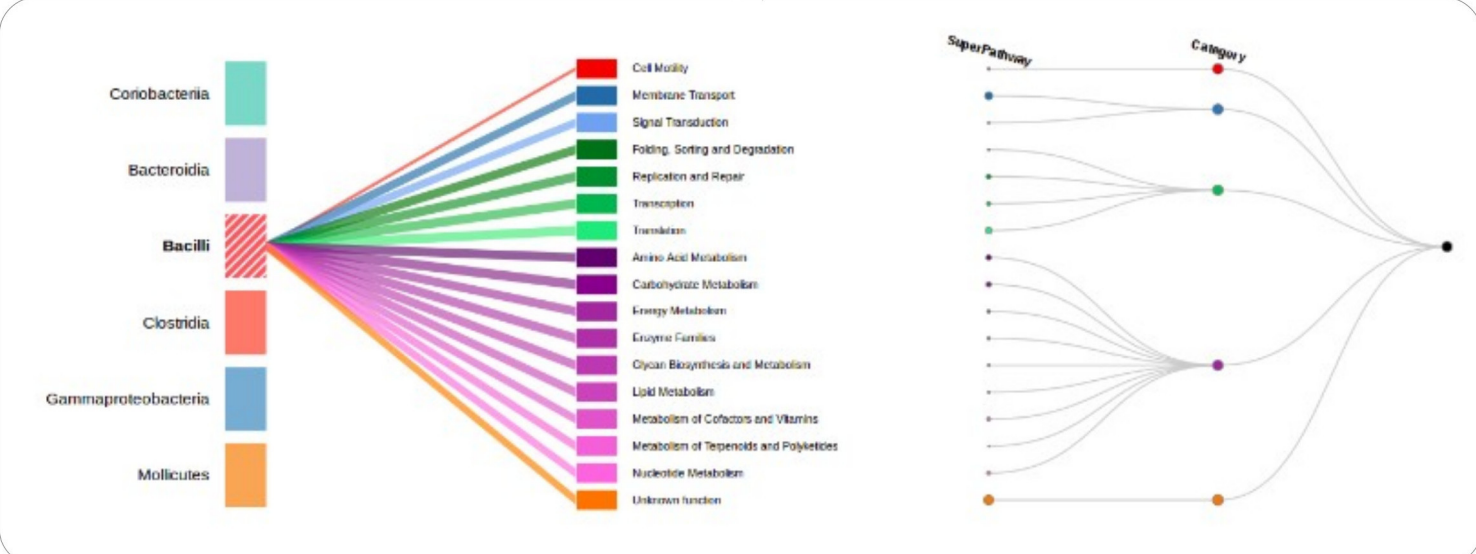

Supplement: Data_Sheet_1.pdf [file Data_Sheet_1.pdf]
