# Supplementary material for: iVikodak—A Platform and Standard Workflow for Inferring, Analyzing, Comparing, and Visualizing the Functional Potential of Microbial Communities
Source: PubMed Central journal article supplement (PMC6339920; doi:10.3389/fmicb.2018.03336), 2019-01-14

**Supplementary file 4:** Schematic representation of input and metadata formats

| Taxa    | S1 | S2 | S3 | S4 | S5  | S6  | S7 | S8 | S9 | S10 | S11 | S12 |
|---------|----|----|----|----|-----|-----|----|----|----|-----|-----|-----|
| Taxon-1 | 12 | 54 | 8  | 2  | 0   | 1   | 0  | 2  | 89 | 96  | 78  | 77  |
| Taxon-2 | 0  | 0  | 6  | 3  | 4   | 5   | 5  | 3  | 12 | 32  | 23  | 31  |
| Taxon-3 | 23 | 29 | 19 | 45 | 12  | 10  | 8  | 12 | 20 | 12  | 17  | 32  |
| ⋮       |    |    |    |    |     |     |    |    |    |     |     |     |
| Taxon-n | 1  | 0  | 3  | 1  | 101 | 189 | 90 | 78 | 88 | 56  | 62  | 49  |

| Samples | Metadata-1 | Metadata-2 | Metadata-3 |       | Metadata-n |
|---------|------------|------------|------------|-------|------------|
| S1      | DDH        | A20-30     | Geo-1      | ..... | Cat-1      |
| S2      | DDH        | A20-30     | Geo-1      |       | Cat-1      |
| S3      | DDH        | A20-30     | Geo-1      |       | Cat-1      |
| S4      | DDH        | A20-30     | Geo-1      |       | Cat-1      |
| S5      | HHH        | A30-40     | Geo-2      |       | Cat-2      |
| S6      | HHH        | A30-40     | Geo-2      |       | Cat-2      |
| S7      | HHH        | A30-40     | Geo-2      |       | Cat-2      |
| S8      | HHH        | A30-40     | Geo-2      |       | Cat-2      |
| S9      | AAA        | Agt60      | Geo-3      |       | Cat-3      |
| S10     | AAA        | Agt60      | Geo-3      |       | Cat-3      |
| S11     | AAA        | Agt60      | Geo-3      |       | Cat-3      |
| S12     | AAA        | Agt60      | Geo-3      |       | Cat-3      |

RDP 

GREEN GENES 

SILVA 

Supplement: Data_Sheet_4.pdf [file Data_Sheet_4.pdf]
